1  
2  
3  
4  
5  
6  
7  
8  
9  
10  
11  
12  
13  
14  
15  
16  
17  
18  
19  
20  
21  
22  
23  
24  
25  
26  
27  
28  
29  
30  
31  
32  
33  
34  
35  
36  
37  
38  
39  
40  
41  
42  
43  
44  
45  
46

## Oculomotor freezing indicates conscious detection free of decision bias

Alex L. White<sup>1\*</sup>, James C. Moreland<sup>2</sup>, and Martin Rolfs<sup>3</sup>

*Running head: Oculomotor freezing is independent of decision bias*

\*Corresponding author, [alwhite@barnard.edu](mailto:alwhite@barnard.edu)

<sup>1</sup>Department of Neuroscience & Behavior  
Barnard College, Columbia University  
76 Claremont Ave  
New York, NY 10027, USA

<sup>2</sup>Department of Psychology  
University of Washington  
119 Guthrie Hall  
Seattle, WA 98195, USA

<sup>3</sup>Department of Psychology  
Humboldt-Universität zu Berlin,  
Rudower Chaussee 18,  
12489 Berlin, Germany

47 **Abstract**

48 The appearance of a salient stimulus rapidly inhibits saccadic eye movements. Curiously,  
49 this “oculomotor freezing” reflex is triggered only by stimuli that the observer reports seeing.  
50 It remains unknown, however, if oculomotor freezing is linked to the observer’s *sensory*  
51 *experience*, or their *decision* that a stimulus was present. To dissociate between these  
52 possibilities, we manipulated decision criterion via monetary payoffs and stimulus probability  
53 in a detection task. These manipulations greatly shifted observers’ decision criteria but did  
54 not affect the degree to which microsaccades were inhibited by stimulus presence.  
55 Moreover, the link between oculomotor freezing and explicit reports of stimulus presence  
56 was stronger when the criterion was conservative rather than liberal. We conclude that the  
57 sensory threshold for oculomotor freezing is independent of decision bias. Provided that  
58 conscious experience is also unaffected by such bias, oculomotor freezing is an implicit  
59 indicator of sensory awareness.

60 **Key words:** perceptual awareness; oculomotor freezing; microsaccades; perceptual  
61 decision-making

62

63 **New & Noteworthy**

64 Sometimes a visual stimulus reaches awareness, and sometimes it does not. To understand  
65 why, we need objective, bias-free measures of awareness. We discovered that a reflexive  
66 freezing of small eye movements indicates when an observer detects a stimulus.  
67 Furthermore, when we biased observers’ decisions to report seeing the stimulus, the  
68 oculomotor reflex was unaltered. This suggests that the threshold for conscious perception is  
69 independent of the decision criterion and is revealed by oculomotor freezing.

## 70 Introduction

71 You can often gain insight into another person's mind by observing how they move their eyes  
72 and what they choose to look at. But even when they attempt to keep their gaze still, tiny  
73 involuntary eye movements reveal aspects of their mental state. Interspersed among slower  
74 types of fixational eye movements, involuntary *microsaccades* rapidly shift the gaze direction  
75 by small amounts (Rolfs 2009; Rucci and Poletti 2015). Microsaccades are in many ways  
76 similar to large saccadic eye movements (Hafed 2011; Otero-Millan et al. 2013; Rolfs et al.  
77 2008), and their frequency and timing are affected by other cognitive and motor processes.  
78 For instance, microsaccade rates decrease in anticipation of sensory events(Abeles et al.  
79 2020; Amit et al. 2019; Badde et al. 2020; Denison et al. 2019) and prior to voluntary eye and  
80 hand movements (Betta and Turatto 2006; Rolfs et al. 2006).

81 A particularly striking oculomotor phenomenon is oculomotor freezing (White and Rolfs  
82 2016): saccadic eye movements are momentarily and automatically inhibited by the  
83 appearance of new stimuli(Engbert and Kliegl 2003; Hafed and Ignashchenkova 2013;  
84 Reingold and Stampe 2002; Rolfs et al. 2008). Specifically, the onset of a stimulus — be it  
85 auditory, tactile, or visual — causes a transient decrease in the spontaneous microsaccade  
86 rate that lasts from roughly 100 to 400 ms, which is followed by a brief rebound above  
87 baseline (Badde et al. 2020; Bonneh et al. 2015; Engbert and Kliegl 2003; Hafed and  
88 Ignashchenkova 2013; Rolfs et al. 2008; Scholes et al. 2015).

89 We recently found that oculomotor freezing is triggered only by stimuli that the observer  
90 detects (as measured by explicit report), revealing a possible link to visual awareness (White  
91 and Rolfs 2016). In those experiments, we presented brief grating stimuli (Gabor patches) on  
92 half the trials and asked the observers to report stimulus presence or absence. We  
93 developed an algorithm to convert microsaccade rates into a measure of oculomotor  
94 sensitivity ( $\sigma$ ) that can be compared to perceptual sensitivity ( $d'$ ). Contrast thresholds for the  
95 two sensitivity measures were indistinguishable (consistent with contemporaneous work by  
96 others (Bonneh et al. 2015; Scholes et al. 2015)). Crucially, the same physical stimulus gave  
97 rise to full-fledged oculomotor freezing when it was detected but caused no change in  
98 microsaccade rates when it was missed. Moreover, microsaccades were inhibited if  
99 observers reported having seen a stimulus even if none had appeared. Because of this  
100 correlation, a Bayesian algorithm could decode from observers' eye movement patterns

101 whether they had detected a stimulus or not. This oculomotor link to perception may provide  
102 a new tool for studies of perception in incommunicative patients, children, or non-human  
103 animals, and for “no-report” studies of consciousness (Tsuchiya et al. 2015).

104 The present study answers an important question left open by all previous studies: is  
105 oculomotor freezing triggered by observers’ *sensory experience*, or by their *decision* that a  
106 stimulus was present? Those two phenomena can be dissociated, and understanding which  
107 one lies at the origin of oculomotor freezing is vital to its interpretation and application. We  
108 consider two hypotheses to explain the established covariation between oculomotor  
109 responses and explicit perceptual detection (Bonneh et al. 2015; Denniss et al. 2018;  
110 Scholes et al. 2015; White and Rolfs 2016). Both assume a classical signal detection model:  
111 on each trial, the stimulus evokes an internal response that is compared against a criterion to  
112 decide whether to produce a response or not. Even when the physical stimulus and task  
113 demands are constant, the sensory response varies across trials, but the criterion is  
114 relatively stable. The two hypotheses concern whether the criterion for oculomotor freezing is  
115 the same as the criterion for explicit perceptual decisions.

116 (1) *Shared criterion*: There is a single decision criterion that determines both explicit  
117 perceptual reports and oculomotor freezing. When the sensory response exceeds the  
118 criterion, it triggers both a “yes” decision and oculomotor freezing. The shared criterion  
119 can be strategically modified, to maximize expected rewards. In support of this possibility,  
120 manipulations of stimulus probability that affect decision bias affect activity in the superior  
121 colliculus (Crapse et al. 2018), which is also causally involved in controlling  
122 microsaccades (Hafed et al. 2009).

123 (2) *Distinct criteria*: There are distinct criteria for triggering oculomotor freezing and for  
124 deciding that a stimulus was present. However, while the oculomotor criterion is  
125 inflexible, the observer can strategically change their perceptual decision criterion to  
126 maximize expected rewards as conditions change. Thus, the two criteria can diverge,  
127 breaking the link between explicit reports and oculomotor freezing. To explain our prior  
128 results(White and Rolfs 2016), this hypothesis assumes that the participants reported  
129 exactly what they perceived and set their decision criterion very near the criterion for  
130 oculomotor freezing.

131 We designed two experiments to discriminate between these hypotheses by manipulating  
132 observers' decision criterion in a detection task. The first experiment used weighted payoffs  
133 (real money won or lost on each trial), and the second varied the expected probability that a  
134 stimulus would appear on each trial. Such manipulations shift the theoretically optimal  
135 criterion to a point that corresponds to a particular likelihood ratio  $\beta_{opt}$  of target presence to  
136 absence, and have been shown to work empirically (Macmillan and Creelman 2005; Mulder  
137 et al. 2012; Swets et al. 1961). Our question here is whether and how these bias  
138 manipulations affect the prevalence of oculomotor freezing. To answer it, we conduct two  
139 main analyses of microsaccade rates: the first separates trials according to the physical  
140 stimulus presence, and the second additionally separates trials according to the participants'  
141 reports of stimulus presence or absence. The shared-criteria hypotheses predict an effect of  
142 bias condition in the first analysis but not the second, the distinct-criteria hypothesis predicts  
143 the opposite.

## 144 **METHODS**

145 Both experiments were pre-registered (<https://osf.io/ycjgr>; <https://osf.io/s9myc/>). The Ethics  
146 Committee of the German Society for Psychology (DGPs) approved the study.

### 147 **Experiment 1**

148 *Participants:* We recruited a total of 16 observers from the Humboldt-Universität zu Berlin  
149 community, with normal or corrected-to-normal vision. They participated in exchange for a  
150 payment that depended on performance (details below). Of the 14 observers who completed  
151 the study (see below), 6 were male, 8 were female, and their ages ranged from 19 to 34  
152 years (mean 26.3). All were naive as to the research aims, and gave informed consent.

153 The sample size was chosen on the basis of a power analysis based on the data from White  
154 & Rolfs (2016). In Experiment 3 of that study, we found an effect of orientation adaptation on  
155 microsaccade rates. That effect size was modest: the maximal difference at 350 ms post-  
156 stimulus was 0.2 Hz. Averaging over the time window when the overall inhibitory effect of  
157 stimulus presence was significant, the mean effect was 0.13 Hz.

158 We made the conservative assumption that if there is an effect of payoff condition, it is 75%  
159 as large as the effect of orientation adaptation, at each individual timepoint. We conducted a

160 power analysis to determine how many participants would be necessary to find such an  
161 effect with a power of 0.8. For each possible sample size (N) between 10 and 20, we  
162 simulated 100 experiments. For each experiment, we conducted a bootstrapping analysis: in  
163 each of 1000 repetition, we drew N observers with replacement from the original data set in  
164 White & Rolfs (2016). For each observer, we computed the difference in microsaccade rate  
165 between the unadapted and adapted condition, at each time point post-stimulus, multiplied  
166 by 0.75. We then averaged those differences across the resampled participants. Over 1000  
167 repetitions we built up a distribution of differences at each time-point, from which we could  
168 extract a p-value. We applied the false discovery rate correction to determine at which time-  
169 points the difference was significant by applying. For each simulated experiment, we  
170 considered the overall effect to be significant if the difference was significant in at least 10  
171 individual time-points. For each N, we defined power as the proportion of experiments with a  
172 significant effect. The minimal N to have a power over 0.8 was 14 (estimated power = 0.87).

173 Two participants began the study but did not finish it and were not included in the analyses.  
174 One was unable to finish all the sessions, and another discontinued after three sessions with  
175  $d'$  far above the acceptable range, due to threshold estimation failure. Thus, the final sample  
176 included 14 participants.

### 177 *Apparatus and Stimuli*

178 Observers sat in a darkened room with their head on a chin rest, 270 cm from a projection  
179 screen that displayed stimuli with a gamma-linearized ProPixx projector (VPixx  
180 Technologies; 120 Hz, 1920 x 1080 pixel resolution). We recorded the gaze position of both  
181 eyes at 500 Hz with a head-mounted Eyelink 2 system (SR Research, Ontario, Canada).  
182 Stimuli were controlled and data collected with the Psychophysics and Eyelink toolboxes  
183 (Brainard 1997; Cornelissen et al. 2002; Pelli 1997). The grayscale display (1920 x 1080  
184 pixels, 120 Hz refresh rate) had 8 bits of resolution in luminance. The background luminance  
185 was set to 35% of its maximum (18.15 cd/m<sup>2</sup>).

186 The fixation mark was a 4 by 4-pixel black-and-white checkerboard pattern of width 0.09  
187 degrees of visual angle (dva). In between trials, this mark was replaced by a circle (0.27 dva  
188 radius) of alternating black and white pixels. The target stimulus was a Gabor pattern: a 0.75  
189 cycles/dva, vertically oriented sinusoidal grating windowed by a two-dimensional Gaussian ( $\sigma$   
190 = 0.67 dva).

191 *Procedure*

192 Observers began each trial by fixating on the central mark. After 0.5–2.5 s, the target Gabor  
193 stimulus flashed for 8.3 ms. The target's onset time had a roughly flat hazard rate: on each  
194 trial, the onset time was set to 0.5 s plus a value drawn from an exponential distribution  
195 (Mean = 0.65 s) clipped at 2 s. The target's phase on each trial was randomly set to either 0°  
196 or 180°. On 50% of the trials, the target had non-zero contrast (target-present trials). On the  
197 remaining trials, its contrast was set to 0, causing no change on the screen (target-absent  
198 trials). The fixation mark remained visible at the center of the Gabor. 492 ms after target  
199 onset, a beep (400 Hz, 50 ms, delivered through headphones) indicated that the trial was  
200 over.

201 The observer's task was to indicate whether the target was present or absent by pressing the  
202 up or down arrow, respectively, with the right hand. Response time was unlimited, but  
203 responses were not allowed before the beep. Tones delivered immediately after the  
204 response indicated whether the response was correct or incorrect, and how many points  
205 were won or lost (details in the next section). After an inter-trial interval (700 ms) containing  
206 only the circular fixation mark, the next trial began.

207 The first session began with practice and then two blocks of staircase trials to estimate the  
208 observer's contrast threshold. During the staircase blocks, the contrast was adjusted after  
209 each trial according to the single-interval adjustment matrix (SIAM) staircase procedure  
210 (Kaernbach 1990). The contrast adjustment depended on the stimulus and response: after a  
211 hit,  $-0.3 \log_{10}$  units; miss,  $+0.3 \log_{10}$  units; false alarm,  $+0.6 \log_{10}$  units; correct rejection, no  
212 adjustment. The magnitudes of these steps were halved after the 1st and 2nd staircase  
213 reversals. In each block, we interleaved two staircases, one starting at a relatively high and  
214 the other at a low level of contrast. The block ended when both staircases underwent 10  
215 additional reversals. The mean contrast of all but the first 2 reversal points provided the  
216 threshold estimate. We defined the observer's contrast threshold as the mean of 4 threshold  
217 estimates (2 from each of 2 blocks).

218 In the main experimental blocks (80 trials each), the target's contrast was set to the  
219 observer's estimated threshold. The mean stimulus contrast in included trials was 9%  
220 (ranging across individuals from 7% to 12%).

221 *Payoff conditions*

222 Our main manipulation is to the reward structure for correct and incorrect responses on  
223 target-present and target-absent trials. On each trial the observer won or “points”, which at  
224 the end of the experiment were converted to a monetary payment (1600 points = €1). By  
225 varying payoffs, we aimed to manipulate the observer’s *detection criterion*: that is, how much  
226 internal sensory evidence is required for the participant to report “target present” (Macmillan  
227 and Creelman 2005; Swets et al. 1961). In the main experimental blocks, there were two  
228 payoff conditions: conservative and liberal. Additionally, a neutral condition was used in the  
229 initial staircase blocks to estimate contrast threshold. Following classic signal detection  
230 theory, we assumed that on each trial the observer bases their decision on a single value  $r$ ,  
231 which is the amount of sensory evidence in favor of target presence. The probability  
232 distribution of  $r$  on target-absent trials is  $f_a(r)$ , a Gaussian with  $\mu=0$  and  $\sigma=1$ . The probability  
233 distribution of  $r$  on target-present trials is  $f_p(r)$ , a Gaussian with  $\mu=d'$  and  $\sigma=1$ .  $d'$  is the  
234 observer’s sensitivity to the target. The observer’s criterion can be expressed as  $c$ , the cutoff  
235 value of  $r$  needed to report presence. A related measure is the observer’s bias, the likelihood  
236 ratio  $\beta$ :

$$237 \quad \beta = \frac{f_p(c)}{f_a(c)} \quad (\text{Eq. 1})$$

238 After substituting the full Gaussian formulas for  $f_p$  and  $f_a$ , we can reduce the equation to:

$$239 \quad \beta = e^{cd' - \frac{d'^2}{2}} \quad (\text{Eq. 2})$$

240 The payoffs in each condition were set to achieve a desired optimal criterion  $\beta_{opt}$ : the value of  
241  $\beta$  that maximizes the expected reward. The values of  $\beta_{opt}$  were 3 for the conservative  
242 condition, 1 for the neutral condition, and 1/3 for the liberal condition. We set the payoffs  
243 such that the optimal observer, with a  $d'$  of 1.5, would earn an average of 6.4 points per trial.  
244 Over 1280 trials, that would yield a payment of €5.12 at our exchange rate of 1600 points/€.   
245 By setting the target luminance contrast to detection threshold, we aimed to keep each  
246 observer’s  $d'$  near 1.5. Given the average expected reward/trial (6.4 points) and the expected  
247  $d'$ , we computed the payoff matrix that would lead an ideal observer to set their criterion to  
248 the desired  $\beta_{opt}$ . Specifically, we computed the payoffs for target-present trials,  $R_p$ , and for  
249 target-absent trials,  $R_a$ . For each trial type  $j$  ( $j=p$  for target-present;  $j=a$  for target-absent), the  
250 reward for correct responses is  $R_j$  points and the reward for errors is  $-R_j$  points.



251 On any given trial, there were four possible outcomes: hits or misses if a target was present,  
252 or correct rejections or false alarms if there was no target. Given  $d'$  and  $\beta$ , we can compute  
253 the probabilities of each of those outcomes. Given  $R_p$  and  $R_a$ , we can then compute the  
254 expected reward  $V$  per trial:

$$255 \quad V = p(\text{hit})R_p - p(\text{miss})R_p + p(\text{correct reject})R_a - p(\text{false alarm})R_a \quad (\text{Eq. 3})$$

256 Given that the prior probabilities of target presence and absence were both equal to 0.5, the  
257 optimal likelihood ratio criterion is the ratio of payoffs:

$$258 \quad \beta_{opt} = \frac{R_a}{R_p} \quad (\text{Eq. 4})$$

259 Therefore, greater payoffs on target-absent trials should induce a conservative (higher)  
260 criterion, whereas greater payoffs on target-present trials should induce a liberal (lower)  
261 criterion. In our conservative condition ( $\beta_{opt} = 3$ ), payoffs on target-absent trials should be  
262 three times payoffs on target-present trials. The inverse is true in the liberal condition.  
263 Working backwards from the equations above, and given our desired  $d'$  and expected reward  
264 per trial ( $V$ ), we computed the payoff matrix shown in **Table 1**.

265 **Table 1:** Payoff matrix. For each condition, this table lists the number of points that can be  
266 won (positive values) or lost (negative values) for each type of response. The neutral  
267 condition was only used in the initial staircase blocks.

| Condition    | Hit ( $R_p$ ) | Miss ( $-R_p$ ) | Correct reject ( $R_a$ ) | False alarm ( $-R_a$ ) |
|--------------|---------------|-----------------|--------------------------|------------------------|
| Conservative | 4.9           | -4.9            | 14.8                     | -14.8                  |
| Liberal      | 14.8          | -14.8           | 4.9                      | -4.9                   |
| Neutral      | 11.7          | -11.7           | 11.7                     | -11.7                  |

268

269 The payoff on each trial was indicated by a feedback tone immediately after the response.  
270 These tones were composed of one, two, or three beeps, depending on the absolute value of  
271 the payoff (as shown in **Table 1**, there were three possible magnitudes). When there were  
272 multiple beeps, their pitches ascended in a major scale for correct responses or descended  
273 in a minor scale for incorrect responses. Each beep was separated by 20 ms of silence. In  
274 the liberal condition, for example, hits won 14.8 points and were followed by three ascending  
275 beeps, whereas false alarms cost 4.9 points and were followed by one low-pitched beep. The  
276 three beeps used for correct tones were: 75 ms of 440 Hz; 80 ms of 587 Hz; and 85 ms of  
277 659 Hz. The three beeps used for incorrect feedback tones were: 75 ms of 196 Hz; 80 ms of  
278 155 Hz; and 85 ms of 131 Hz.

279 The total number of points won were displayed at the end of each block. Prior to each block,  
280 instructions regarding the payoff structure were displayed on the screen. These instructions  
281 consisted of a 2x2 table showing the number of points that could be won or lost for reporting  
282 “Yes” or “No” depending on whether a target was present or absent. The values in this table  
283 were the same as in the corresponding condition’s row in **Table 1**, rounded to the nearest  
284 integer. A single sentence was written above the table: in the Conservative condition,  
285 “Rewards and penalties are greatest when the target is absent.”; in the Liberal condition,  
286 “Rewards and penalties are greatest when the target is present.”

287 Importantly, the words “liberal” or “conservative” were never said to the participants, nor did  
288 experimenters tell them what the optimal strategy was for any given condition. However, in  
289 the first training session, the participant read a longer document of instructions that said, “In  
290 the main part of the experiment, we will vary the number of points you can win or lose  
291 depending on presence of the target and the response you make. There are two types of  
292 blocks that differ in the relative rewards and penalties on trials when the target was really  
293 present or absent. To win the most money, you should adjust how sure you need to be to say  
294 ‘yes’ or ‘no’, depending on the points available for each type of response in the current  
295 block.” When introducing the conservative condition, the instructions said: “You will win three  
296 times as many points when the target is absent and you say no, than when a target is  
297 present and you say yes...and lose three times as many points when the target is absent  
298 and you say yes, than when a target is present and you say no.” Complementary instructions  
299 followed for the liberal condition. Observers were also instructed that they could win points  
300 and earn money during the staircase blocks as well as the main blocks.

301 In the first session, we informed observers that they would be paid a base hourly rate of  
302 €7/hour, plus a bonus equal to the total number of points they accumulated during the trials,  
303 divided by 1600. The maximum bonus they could earn in any given hour-long session was  
304 €4. The mean bonus paid for two main experimental sessions was €4.66 (range €4.13 to  
305 €5.30).

306 Each participant completed a total of 8 blocks of each condition (for a total of 640  
307 trials/condition). The first session began with practice, the staircase to estimate threshold,  
308 and if time permitted, some main experimental blocks. In each subsequent session (about  
309 one hour each), the typical observer completed 8 blocks: the first four of one payoff  
310 condition, and the next four of the other condition. In each session, observers thus did an

311 equal number of blocks of the two payoff conditions. The order of conditions alternated  
312 across sessions, and a random half of the observers started with the liberal condition.

313 Completing all 16 blocks required a total of three sessions for the typical participant  
314 (including the first staircase session). At the start of the 2<sup>nd</sup> and 3<sup>rd</sup> sessions, a practice block  
315 established whether the prior session's contrast threshold was still appropriate; in some  
316 cases, it was necessary to re-evaluate the threshold and re-set the contrast level for that  
317 session to keep  $d'$  near 1.5. If the overall  $d'$  in a full session (~8 blocks) was above 2.0 or  
318 below 1.0, we excluded those blocks from analysis and re-ran them in an extra session. This  
319 occurred when our threshold estimate was significantly inaccurate. A total of three sessions  
320 from three participants were excluded and re-run in that fashion. The reason to exclude them  
321 is that our analyses of interest depend on the target stimulus being at threshold visibility.  
322 Importantly, we always excluded and re-ran the same number of blocks of each payoff  
323 condition.

#### 324 *Eye-tracking*

325 At the start of each block, we performed a 9-point calibration within a central square region,  
326 21 dva wide. Every 28 trials, we performed a standard drift correction by having the observer  
327 press a key while fixating a dot at the screen's center. If either eye's gaze position deviated  
328 more than 2 dva from the fixation mark between the start of a trial start and the beep, that  
329 trial was immediately terminated and repeated at the end of the block. We also detected  
330 fixation breaks offline by defining, for each trial, the fixation position as the median gaze  
331 coordinates during the first 100 ms of the trial, and fixation breaks as deviations >2 dva from  
332 that. Trials with offline-detected fixation breaks were excluded from the analysis, but that only  
333 excluded an average of 1 trial per participant (maximum 3).

#### 334 **Experiment 2**

335 *Participants:* We recruited a total of 20 observers from the Humboldt-Universität zu Berlin  
336 community. All had normal or corrected-to-normal vision, participated in exchange for  
337 payment, and gave informed consent. Of the 14 observers who completed the study and  
338 were included in the analysis (see below), 4 were male, 10 were female, and their ages  
339 ranged from 20 to 37 years (mean 25.4).

340 We used the same number of participants as in Experiment 1, but with twice as many trials  
341 per condition. The reason is that this experiment contained a condition in which the target

342 was half as likely to appear (and we needed to separately analyze trials with and without  
343 targets). 6 participants were not included in the analysis because they discontinued  
344 participation before completing the study (in two cases because their  $d'$  was out of range in  
345 one or more completed sessions and they declined to repeat them). Thus, the final sample  
346 included 14 observers.

#### 347 *Procedure*

348 All stimuli and methods in Experiment 2 were the same as in Experiment 1, except as noted  
349 here. Observers began each trial by fixating on the central mark. Then a *probability cue*  
350 appeared for 1 s. The target probability cues were formed of 12 dots (each 0.2 dva in  
351 diameter) arranged in a ring around fixation (radius 3 dva). The dots on each trial were all of  
352 the same color, either cyan or magenta. For half the observers, a cyan cue indicated low  
353 target probability and magenta indicated high target probability. For the other half of  
354 observers, the colors were reversed. Then, after a variable delay of 0.5–2.5 s, the target  
355 Gabor stimulus flashed for 1 frame (8.3 ms), and the trial proceeded as in Experiment 1. The  
356 mean stimulus contrast in included trials was 6% (ranging across individuals from 5% to 9%).

#### 357 *Feedback and rewards*

358 The feedback and reward structures were matched to the “neutral” condition in Experiment 1  
359 (used in the staircase blocks). The participants won 11.7 points on correct trials (hits or  
360 correct rejections) and lost 11.7 points on incorrect trials (misses or false alarms). The  
361 feedback tones were two ascending beeps or two descending beeps.

#### 362 *Probability conditions*

363 Our main manipulation was the probability of a target being present on each trial ( $p_T$ ). In “low-  
364 probability” trials,  $p_T = 0.25$ , and on “high probability” trials,  $p_T = 0.75$ . Those trials were  
365 randomly intermixed, because if they were in separate blocks, there could be hysteresis  
366 effects due to different amounts of stimulation in each block. The cyan or magenta pre-cue  
367 indicated the target probability condition at the start of each trial.

368 Given the average expected reward/trial (6.4 points) and the expected  $d'$  (1.5), we computed  
369 the target probabilities that would lead an ideal observer to set their criterion to the desired  
370  $\beta_{opt}$ . Using the expected reward on each trial (Eq. 3), we can compute  $\beta_{opt}$  from the ratio of  
371 payoffs, scaled by the ratio of the probability of no target and the probability of a target:

372 
$$\beta_{opt} = \frac{R_a(1-p_T)}{R_p p_t} \quad (\text{Eq. 5})$$

373 See Swets et al. (1961) for an equivalent derivation. In Experiment 2,  $R_a = R_p = 11.7$  points.

374 Therefore,

375 
$$\beta_{opt} = \frac{(1-p_T)}{p_T} \quad (\text{Eq. 6})$$

376 In the low-probability condition,  $p_T = 0.25$  and  $\beta_{opt} = 3$ , the same as in the conservative payoff  
377 condition of Experiment 1. In the high-probability condition,  $p_T = 0.75$  and  $\beta_{opt} = 1/3$ , the same  
378 as in the liberal payoff condition of Experiment 1. We therefore label the low-probability  
379 condition as the conservative condition, and the high-probability condition as the liberal  
380 condition.

381 At the start of the experiment, the observer was instructed to pay attention to the colored  
382 probability cues and was told their exact meaning. We did not tell the observers *how* to use  
383 the cues, but we did tell them, “If you pay attention to the colored dots and adjust your  
384 responses accordingly, you could gain roughly 20% more money than if you ignore them!”.  
385 Prior to each block, we displayed a reminder about what the probability cues mean.

386 Each participant completed a total of 32 blocks of the experiment (80 blocks per trial, for a  
387 total of 2560 trials, 1280 per condition). Completing all 32 blocks required a total of five or 6  
388 sessions for the typical participant (including the first staircase session). The mean bonus  
389 paid for the main experimental sessions was €10.67 (range €7.61 to €13.64).

390 As in Experiment 1, we excluded and re-ran sessions with  $d'$  above 2.0 or below 1.0. That  
391 occurred for a total of 5 sessions, one per each of 5 observers. On average, less than 0.1%  
392 of trials were excluded for offline fixation breaks (max 0.3%).

## 393 **Analyses**

### 394 *Perceptual data analysis*

395 We excluded trials with reaction times  $>4$  SDs above the observer’s median. Across  
396 participants, this criterion excluded an average of 1% of trials in Experiment 1 (maximum  
397 1.6%), and an average of 0.7% in Experiment 2 (maximum 1.4%). We then computed  
398 perceptual sensitivity in each condition using the observer’s hit rate (HR, the proportion of  
399 ‘yes’ responses on target-present trials) and false alarm rate (FR, the proportion of ‘yes’  
400 responses on target-absent trials):

401 
$$d' = z(\text{HR}) - z(\text{FR}) \quad (\text{Eq. 7})$$

402 where  $z$  is the inverse of the normal cumulative distribution function. To avoid undefined  $d'$   
403 values, HR and FR were not allowed to fall below  $1/(2N)$  nor to exceed  $(1-1/(2N))$ , where  $N$   
404 is the number of target-present or absent trials. For example, if the hit rate was 1, we  
405 assumed that, had we run twice as many trials, there would have been 1 miss. We also  
406 report the observer's criterion

407 
$$c = z(1-\text{FR}) \quad (\text{Eq. 8})$$

408 From that, we compute the bias  $\beta$ , the likelihood ratio, using Equation 2 defined above.

409 To evaluate the effect of payoff condition on these perceptual measures ( $d'$  and  $\beta$ ), we used  
410 bootstrapping to estimate 95% confidence intervals between pairs of conditions. A difference  
411 is deemed significant if the 95% confidence interval excludes 0 (a two-tailed test).

#### 412 *Microsaccade detection*

413 The trial exclusion criteria applied in the perceptual data analysis (see above) also applied to  
414 the eye movement analysis. Our analysis of eye movement traces followed the procedure  
415 reported in our previous paper (White and Rolfs 2016). We first transformed the raw gaze  
416 positions into velocities (dva/s) and smoothed them by averaging over neighboring pairs of  
417 two samples. Then, we identified microsaccadic events as shifts in gaze position with 2D  
418 velocities that exceed—for at least 3 samples—an ellipse with horizontal and vertical radii  
419 equal to five times the horizontal and vertical median-based standard deviations, respectively  
420 (Engbert and Mergenthaler 2006). However, for 6 observers in Experiment 1, and 3 in  
421 Experiment 2, the fixed threshold of 5 SDs yields very few microsaccades, so we lowered the  
422 threshold to 4.

423 Monocular microsaccadic events less than 10 ms apart were merged. We defined binocular  
424 microsaccades as those with at least 1 sample of overlap between the two eyes, and again,  
425 merged binocular microsaccades less than 10 ms apart. We defined microsaccade onset as  
426 the time the first of the two eye velocities exceeded the threshold, and offset as the timepoint  
427 just before the last eye's velocity dropped below threshold. Other parameters (e.g.,  
428 amplitude) were averaged over the two eyes. We included in the analysis only binocular  
429 microsaccades with durations  $\geq 6$  ms, amplitudes  $\leq 1$  dva, and peak velocities  $\leq 250$  dva/s.

#### 430 *Microsaccade rate analysis*

431 We then determined the time-varying microsaccade rate for each experimental condition with  
432 a smoothing procedure. First, we counted the number of microsaccades detected at each  
433 millisecond  $t$  relative to target onset, across all trials in each condition. Then, for each time  
434 point  $t$ , we computed a weighted sum of microsaccades in the local interval, using a “causal”  
435 kernel:

$$436 \quad \omega(\tau) = \alpha^2 \tau e^{-\alpha\tau} \quad (\text{Eq. 9})$$

437  $\omega$  describes the weight given to microsaccades  $\tau$  ms before time point  $t$ . We shifted the filter  
438 by  $1/\alpha$  ms to avoid a temporal bias and give the most weight to microsaccades at point  $t$   
439 (Rolfs et al. 2008; Widmann et al. 2014). The parameter  $\alpha$  was set to  $1/25$ . The smoothed  
440 rate  $r(t)$  is the weighted sum of microsaccades divided by the total number of trials in the  
441 sample, and converted into Hz by multiplying by 1000. Microsaccade rates were computed  
442 from  $-350$  to  $+500$  ms relative to target onset.

443 To estimate the statistical significance of changes in microsaccade rates, we bootstrapped  
444 them by simulating 1000 repetitions of the experiment (Efron and Tibshirani 1993). On each  
445 repetition, we resampled with replacement from the set of observers then took the mean  
446 between conditions. That gave us distributions of differences at each time point. The two-  
447 tailed bootstrapped  $p$ -value is defined as twice the proportion of differences that fell below 0.  
448 When evaluating differences at many time points, we applied the false discovery rate  
449 correction (Benjamini and Hochberg 1995). Two conditions are deemed significantly different  
450 if the 95% confidence interval of differences does not include zero (corrected  $p < 0.05$ ). (Note:  
451 this bootstrapping procedure differs from what we pre-registered, in that it is simpler and  
452 focuses on variability across observers rather than variability across trials within each  
453 observer, thus being a nonparametric analogue of a  $t$ -test).

454 To directly compare changes in microsaccade rate to perceptual sensitivity, we computed an  
455 analogous estimate of oculomotor sensitivity (White and Rolfs 2016). At each millisecond,  
456 the lack of a microsaccade following a stimulus is a “hit”, and the lack of a microsaccade  
457 following no stimulus is a “false alarm”. From the resulting oculomotor hit rate (HR) and false  
458 alarm rates (FAR), we can compute oculomotor  $d'_o$  at each time point  $t$  relative to stimulus  
459 onset ( $0 \leq t \leq 500$ ):

$$460 \quad d'_o(t) = z(\text{HR}(t)) - z(\text{FAR}(t)) \quad (\text{Eq. 10})$$

461 Like perceptual  $d'$ , this measure requires correction if HR or FAR reach extreme values. This  
462 can happen if no microsaccade were detected during a period around  $t$  as wide as the base  
463  $B$  of the filter ( $\sim 200$  ms). Therefore, both rates will not be allowed to fall below  $1/(2NB)$  nor to  
464 exceed  $(1-1/(2NB))$ , where  $N$  is the number of target-present or absent trials, respectively.  
465 That is, we assume that had we run twice as many trials, we would have found at least 1  
466 microsaccade (a 'miss') in the 200 ms time-window surrounding any given time point.  
467 Nonetheless, because microsaccades occur only about once or twice every second, both HR  
468 and FAR at individual (millisecond) time points will be high (above 0.999). But because HR  
469 rose even higher than FAR after stimulus presentation, we found positive values of  $d'_o$ .

470 To extract a single oculomotor sensitivity measure from an entire rate time course for a given  
471 condition, we defined a value  $o'$ , the maximum of the cumulative sum of  $d'_o$  values across  
472 time (within 200 to 550 ms post-stimulus).  $o'$  is unaffected by rate rebounds following  
473 inhibition, which result in negative  $d'_o$ . Pairwise differences in  $o'$  (across payoff conditions)  
474 were tested with bootstrapping, similar to perceptual  $d'$  as described above.

475 In addition to the pre-registered analyses reported thus far, we conducted two exploratory  
476 analyses. First, to simplify the comparison of microsaccade rates across conditions (without  
477 relying on hundreds of noisy tests at many individual time points), we computed the  
478 microsaccade rates integrated across two time windows: for the baseline microsaccade rate  
479 on target absent trials, we used the time window 0 to 500 ms. For target present trials, we  
480 used the time window within which the microsaccade rate on target present trials was  
481 significantly lower than the rate on target absent trials, for both bias conditions (bootstrapped  
482 FDR-corrected  $p < 0.05$ ). This is the *time window of significant oculomotor freezing* (see  
483 results).

484 Second, compared to our previous studies, we found that baseline microsaccade rates were  
485 lower on average and more variable across, which complicates comparing rates by taking  
486 simple differences (liberal-conservative) between conditions. We therefore computed  
487 *modulation indices* that are more robust to variation across observers in overall  
488 microsaccade rates:  $(A - B) / (A + B)$ , where  $A$  and  $B$  refer to a measure in specific  
489 conditions (e.g., microsaccade rate on conservative vs liberal trials; or report-present vs  
490 report-absent trials). This index ranges from -1 to 1, where positive values indicate higher  
491 microsaccades rates in  $A$  as compared to  $B$ , and negative values indicate the opposite.



492 Finally, we supplement our pairwise tests with Bayes Factors (BFs), which quantify strength  
493 of evidence. In this context, a BF is the ratio of the probability of the data under the alternate  
494 hypothesis (that two conditions differ), relative to the probability of the data under the null  
495 hypothesis (that there is no difference) (Rouder et al. 2009, 2012). As an example, a BF of  
496 10 indicates that the data are ten times more likely under the alternate hypothesis than the  
497 null hypothesis. Typically, BFs between 1 and 3 are regarded as weak evidence for the  
498 alternate hypothesis, BFs between 3 and 10 as substantial evidence, and BFs between 10  
499 and 100 as strong evidence (Kass and Raftery 1995). Conversely, BFs between than 1/3 and  
500 1/10 are considered substantial evidence for the null hypothesis, etc. We computed BFs for  
501 pairwise t-tests and two-way repeated measures ANOVAs using the bayesFactor toolbox by  
502 Bart Krekelberg (<https://github.com/klabhub/bayesFactor>: DOI: 10.5281/zenodo.4394422).

503

## 504 **RESULTS**

505 *Explicit perceptual reports: Bias manipulations affect decision criteria but not sensitivity*

506 On each trial, observers reported the presence or absence of a brief Gabor stimulus with a  
507 luminance contrast that had been set to their individual detection threshold. The time of the  
508 target's onset was unpredictable, but the end of each trial was indicated by a beep 500 ms  
509 after the time of (potential) target appearance. The observers' goal was to win "points" that  
510 were converted to bonus monetary payments. Correct responses (hits and correct rejections)  
511 gained points and incorrect responses (misses and false alarms) lost points.

512 In Experiment 1, we introduced asymmetric monetary payoffs to manipulate decision bias. In  
513 the liberal condition, rewards were three times greater for hits than correct rejections, and  
514 penalties were three times greater for misses than false alarms. This reward structure places  
515 the optimal criterion at the level of sensory evidence that is three times as likely to be  
516 observed when the target is absent than present. Thus, the optimal likelihood ratio  $\beta_{opt} = 1/3$ .  
517 In the conservative condition, rewards were three times greater for correct rejections than  
518 hits, and penalties were three times greater for false alarms than misses. That makes  $\beta_{opt} =$   
519 3. The reward structure varied across blocks of trials and was known to the participant in  
520 advance. Feedback at the end of each trial indicated the reward magnitude.

521 In Experiment 2, we manipulated probability that a target would appear, and informed  
522 observers of that probability on each trial. In the liberal condition, there was a 75% chance

523 that a target would appear (3x likelier to be present than absent), which lowered the optimal  
 524 criterion such that  $\beta_{opt} = 1/3$ . In the conservative condition, there was a 25% chance that a  
 525 target would appear, raising the optimal criterion such that  $\beta_{opt} = 3$  (as in Experiment 1).  
 526 These trial types were randomly intermingled within blocks, but a cue in the form of colored  
 527 dots presented at the start of each trial informed the participant of the target probability.  
 528 Payoffs on target-presence and target-absent trials were of equal magnitude.

529 In both experiments, the bias manipulation strongly affected explicit perceptual reports of  
 530 target presence. The mean hit and false alarm rates, their mean differences between bias  
 531 conditions, and the 95% confidence interval (CI) of those differences, are listed in **Table 2**.  
 532 Hit rates and false alarm rates were much lower in the conservative than liberal condition,  
 533 indicating that participants were less willing to report seeing a target when the potential  
 534 payoffs were greater on target absent trials (Experiment 1), and when target presence was  
 535 unlikely (Experiment 2). Response times are plotted in **Supplementary Figure 1**  
 536 (<https://osf.io/t9by7/>).

|                           |               | Conservative | Liberal     | Diff         | Diff 95% CI   |
|---------------------------|---------------|--------------|-------------|--------------|---------------|
| <b>Hit rate</b>           | <i>Expt 1</i> | 0.57 (0.02)  | 0.79 (0.01) | 0.22 (0.03)  | [0.18 0.27]   |
|                           | <i>Expt 2</i> | 0.41 (0.02)  | 0.73 (0.04) | 0.32 (0.05)  | [0.22 0.40]   |
| <b>False alarm rate</b>   | <i>Expt 1</i> | 0.06 (0.01)  | 0.38 (0.04) | 0.31 (0.04)  | [0.24 0.40]   |
|                           | <i>Expt 2</i> | 0.07 (0.01)  | 0.45 (0.07) | 0.38 (0.07)  | [0.27 0.52]   |
| <b><i>d'</i></b>          | <i>Expt 1</i> | 1.95 (0.12)  | 1.90 (0.10) | -0.05 (0.08) | [-0.22 0.09]  |
|                           | <i>Expt 2</i> | 1.12 (0.09)  | 1.27 (0.07) | 0.15 (0.11)  | [-0.02 0.40]  |
| <b><math>\beta</math></b> | <i>Expt 1</i> | 2.32 (0.38)  | 0.42 (0.02) | -1.89 (0.39) | [-2.72 -1.29] |
|                           | <i>Expt 2</i> | 1.80 (0.09)  | 0.59 (0.06) | -1.21 (0.11) | [-1.39 -0.99] |

537 **Table 2: Explicit reports in each condition of each experiment.** The first two columns list the  
 538 across-subject mean values, with the standard error in parentheses. The column labeled “Diff” is the  
 539 average (and SEM) difference: liberal – conservative. The final column is the 95% bootstrapped  
 540 confidence interval (CI) of the difference. When a CI excludes 0, we conclude there is a significant  
 541 effect of the bias condition. *d'* and  $\beta$  are sensitivity and bias measures assuming unequal variance of  
 542 sensory evidence on target-present and target-absent trials (see text).

543 To interpret these psychophysical data, we adopt the classic signal detection model: the  
 544 participant reports target presence if the magnitude of sensory evidence  $E$  exceeds a  
 545 criterion level  $c$ . The variances of  $E$  on target-absent and target-present trials are often  
 546 unequal, and can be estimated with a receiver operating characteristic (ROC) graph (Swets

547 et al. 1961). The ROC in **Figure 1a** plots false alarm rates vs hit rates, each z-transformed  
548 through the inverse normal cumulative distribution function. For each participant, one line  
549 connects their points for the liberal (blue) and conservative (red) conditions. If the  
550 distributions of sensory evidence have equal variance, then these lines should have slopes  
551 equal to 1 (illustrated with thick diagonal black lines). The empirical slopes are consistently  
552 shallower: in Experiment 1, the mean slope was 0.53 (95% CI = [0.46 0.60]), and in  
553 Experiment 2 it was 0.60 (95% CI = [0.50 0.69]). Assuming that the target-absent  
554 distributions have standard deviations (SDs) equal to 1, the SD of the target-present  
555 distributions are equal to the inverse of the ROC slopes: 1.90 in Experiment 1 and 1.66 in  
556 Experiment 2. These best-fitting signal detection models are shown in **Figure 1b**, with the  
557 mean criteria (computed directly from false alarm rates) as vertical blue and red lines.

558 Using these estimated variances, we computed  $d'$ , a measure of sensitivity (**Figure 1c**), and  
559  $\beta$ , a measure of bias (**Figure 1d**).  $d'$  is the distance between the mean  $E$  (sensory evidence)  
560 on target-present trials and the mean  $E$  on target-absent trials.  $\beta$  is the likelihood ratio of  
561 target presence to target absence when  $E = c$ . Using the formulas for  $\beta$  and  $d'$  (Equations 2  
562 and 7) that typically assume equal variance, we substituted the best-fitting SDs into the  
563 probability and cumulative density functions. Statistics for both measures are reported in  
564 **Table 2**.  $d'$  did not significantly differ between the liberal and conservative conditions (CIs  
565 include 0), but  $\beta$  was significantly higher in the conservative condition, for all participants.  
566 The dashed lines in **Figure 1f** are the optimal  $\beta_{opt}$  in each condition. Most participants did not  
567 shift their criteria quite far enough to reach the optimal levels (Kubovy 1977). For the  
568 estimates of  $d'$  and  $\beta$  that (incorrectly) assume equal variance on present and absent trials,  
569 see **Supplementary Figure 2** (<https://osf.io/t9by7/>).

570

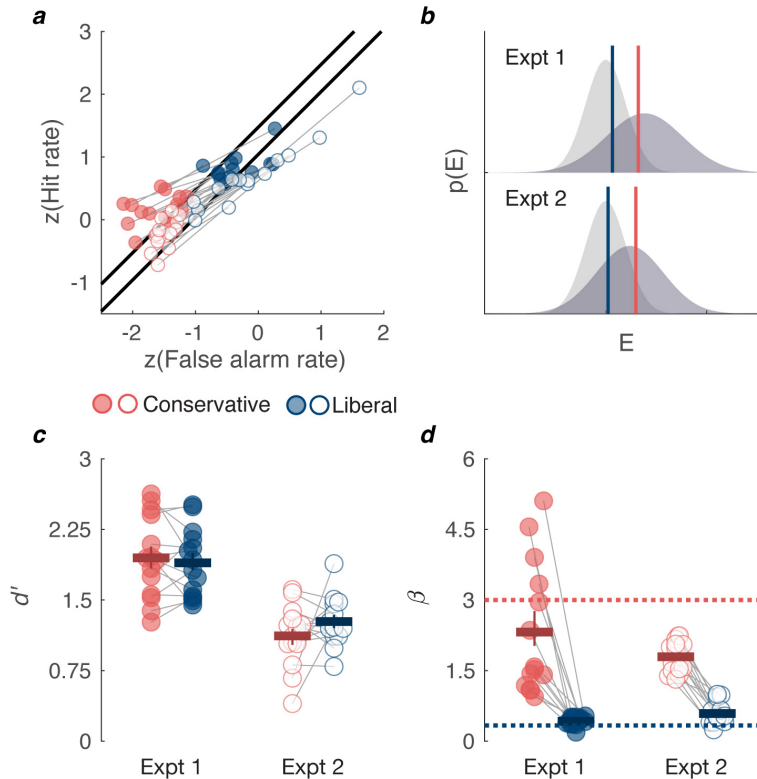

571  
572  
573  
574  
575  
576  
577  
578  
579  
580  
581  
582  
583  
584  
585  
586  
587  
588  
589  
590  
591  
592

**Figure 1: Bias manipulations affect explicit perceptual reports.** (a) The receiver operating characteristic (ROC) showing individual z-transformed hit and false alarm rates. The two black lines with slope 1 are the predictions of an equal-variance model for each experiment (Expt. 1 is the upper black line). The data have slopes consistently less than one, suggesting that the distribution of sensory evidence has higher variance when the target is present rather than absent. (b) Signal detection models that account for the empirical hit and false alarm rates. These show probability distributions of sensory evidence  $E$  on target-absent trials (light gray distributions) and target-present trials (darker distributions). The standard deviations of the target-present distributions were derived from the average ROC slopes in panel a. The blue and red vertical lines are the mean empirical criteria (computed from false alarm rates) in the liberal and conservative conditions, respectively. (c) Individual participants' detection sensitivity  $d'$ , assuming that the sensory evidence distributions have unequal variance as modeled in panel b. Experiment 1 is in filled circles, Experiment 2 in open circles. Thin gray lines connect points from the same participant. The horizontal positions of individual data points are jittered to avoid total overlap, but points from the same participant have the same relative jitter. The horizontal lines represent the means, with error bars spanning the 68% bootstrapped confidence interval (approx.  $\pm 1$  SEM). (d) Individual participants' decision bias computed as  $\beta$  for each participant, again assuming unequal variance. Format as in panel c. Horizontal dotted lines are the optimal  $\beta$  for each condition (dark blue = liberal; light red = conservative).

593 In sum, both bias manipulations had large effects on decision criteria for explicit judgements,  
594 while sensitivity remained unaffected.

595 *Microsaccade rates contingent on physical target presence: Bias manipulations do not affect*  
596 *oculomotor freezing*

597 **Figures 2a** and **2b** show the mean microsaccade rates plotted as a function of time relative  
598 to target onset. The target, when present, was flashed at time point 0. In both experiments  
599 we observed oculomotor freezing on target-present trials (solid lines): the microsaccade rate  
600 begins to drop roughly 130-150 ms after stimulus onset, and then returns to baseline 300-  
601 400 ms later. The key question is whether microsaccade rates differ between the liberal and  
602 conservative bias conditions. The *distinct-criteria hypothesis* predicts no difference. The  
603 *shared-criterion hypothesis*, which posits that oculomotor freezing is linked to explicit report  
604 decisions, predicts a greater drop in microsaccade rates on target-present trials of the liberal  
605 condition, in which the participant reports “present” more often. The data do not support the  
606 shared-criterion hypothesis. Although the mean rate in the liberal condition (blue line) dips  
607 slightly lower than in the conservative condition (red line), that effect is small and not  
608 consistent across participants.

609 To simplify this analysis and maximize power, we integrated microsaccades over two key  
610 time windows: 0 to 500 ms for target-absent trials and the window of significant oculomotor  
611 freezing for target-present trials (shaded windows in **Figures 2a** and **2b**; see **Methods**). In  
612 Experiment 1, the window of significant freezing was from 149 ms to 421 ms, and in  
613 Experiment 2 it was 145 to 509 ms. As shown in **Figures 2c** and **2d**, there were no reliable  
614 effects of bias condition on the mean microsaccade rates in these time windows. We  
615 evaluated the effects both as mean differences ( $L - C$ , where  $L$  is the rate on liberal trials and  
616  $C$  on conservative trials) and as modulation indices  $[(L - C)/(L + C)]$  that adjust for individual  
617 differences in overall microsaccade rate. With one exception, none of those effects were  
618 significant: 95% CIs include 0, and Bayes Factors (BFs) support the null hypothesis at least  
619 2:1 (BFs < 0.5). The one exception is for target-absent trials in Experiment 2: when the effect  
620 is expressed as a modulation index, the baseline microsaccade rate was slightly but  
621 significantly lower on liberal than conservative trials (mean index = -0.09, 95% CI = [-0.17 -  
622 0.02]; BF=1.35. The mean difference was only -0.02 Hz (95% CI = [-0.04 0.03]; BF=0.37).

623

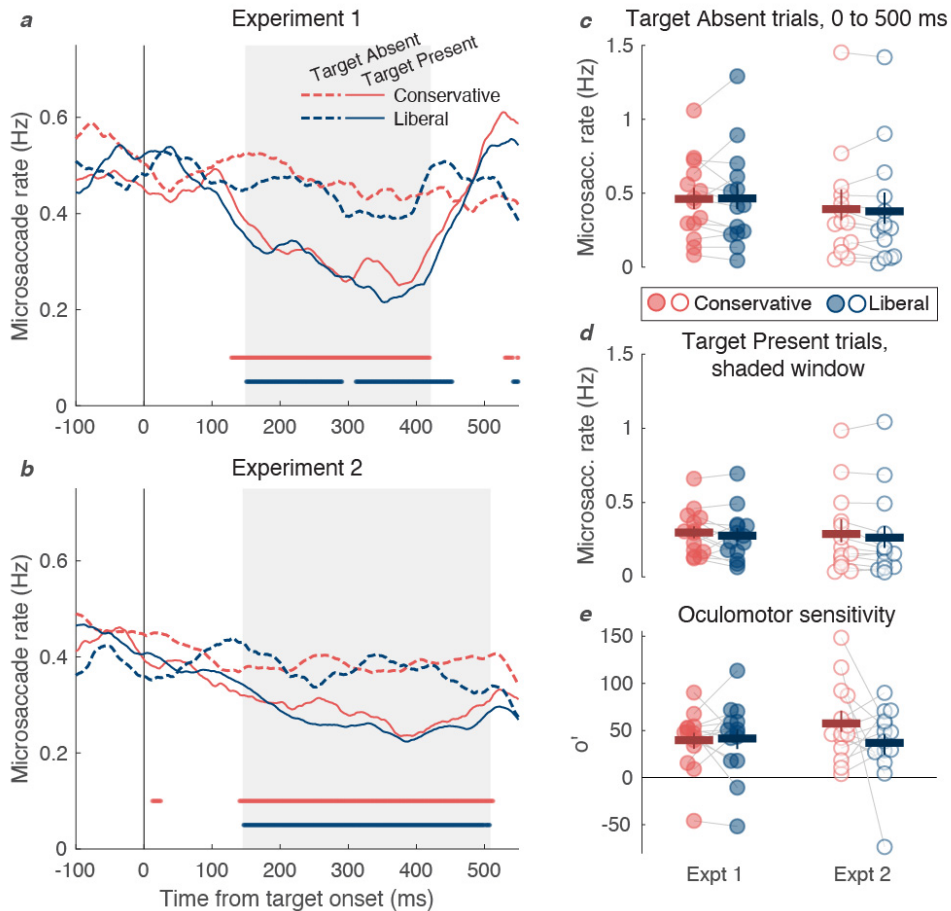

624  
625  
626  
627  
628  
629  
630  
631  
632  
633  
634  
635  
636  
637  
638

**Figure 2: Bias manipulations do not affect overall microsaccade rates on target-present and target-absent trials. (a,b)** Mean microsaccade rates as a function of time relative to target onset in Experiments 1, for target-absent trials (dotted lines) and target-present trials (solid lines). The horizontal lines at the bottom of each plot indicate time points when the rate on target-present trials is significantly different from the rate on target-absent trials (corrected  $p < 0.05$ ). The gray region of the background indicates the time window when the rate was significantly reduced on target-present trials in both conditions. **(c)** Mean microsaccade rates on target-absent trials in the time window between 0 and 500 ms. Format as in Figure 1a. **(d)** Mean microsaccade rates on target-present trials in the time windows with significant inhibition in both conditions (shaded portions in panels a and b). There are no significant effects of bias condition. **(e)** Oculomotor sensitivity ( $\sigma'$ ), a measure of the difference in microsaccade rates between target-present and target-absent trials over the entire interval 0 to 500 ms. There are no significant effects of bias condition.

639 To combine across experiments, we entered these data into linear mixed effects models  
640 (LMEs), with fixed effects for condition, experiment, and their interaction, as well as random  
641 effects for participant. We fit one such model for the target-absent trials and another for the  
642 target-present trials. The effect of condition was negligible in both analyses (0.006 and 0.02  
643 Hz, respectively), and not significant (both  $p > 0.10$ ; both  $BF < 0.5$ ). There were no effects of  
644 experiment nor interaction between experiment and condition (all  $p > 0.5$ ).

645 We also computed oculomotor sensitivity ( $\sigma$ ) as a measure of the strength of oculomotor  
646 freezing (White and Rolfs 2016) (**Figure 2e**), comparable to  $d'$ . In both experiments,  $\sigma'$  did  
647 not differ significantly between bias conditions: 95% CIs were far from excluding 0 and Bayes  
648 Factors supported the null hypothesis (all BFs<0.5). If anything, the effect in Experiment 2  
649 (conservative > liberal) went in the direction opposite predicted by the shared criterion  
650 hypothesis, but was not significant (mean modulation index = -0.32, 95% CI = [-1.55 0.11]).  
651 An LME combining across experiments found no effect of condition ( $p=0.32$ , 95% CI = [-28.4  
652 9.5]; BF=0.30) and no main effect of experiment nor interaction (both  $p>0.2$ ).

653 Altogether, the microsaccade rates in this first analysis are consistent with the distinct-criteria  
654 hypothesis: oculomotor freezing is independent of bias manipulations that affect explicit  
655 perceptual reports. Next, we sorted the data further by the participant's report on each trial.  
656 Based on our prior study (White and Rolfs 2016), we predicted more oculomotor freezing on  
657 trials when the participant reports seeing a stimulus than when they don't, but the magnitude  
658 of that effect may depend on the bias condition.

659 *Microsaccade rates contingent on explicit perceptual reports: Oculomotor freezing is stronger*  
660 *in conservative than liberal bias conditions*

661 When we analyze trials separately according to whether the participant reported target  
662 presence or absence, the shared-criterion hypothesis predicts no effect of bias condition.  
663 The observer's ultimate decision is the same on liberal hit trials as on conservative hit trials,  
664 so the prevalence of oculomotor freezing should be the same. In contrast, the distinct-criteria  
665 hypothesis predicts an effect of bias condition: when considering only trials in which the  
666 observer reports target presence (hits and false alarms), microsaccade rates should be lower  
667 in the conservative condition than liberal condition. This is because in the conservative  
668 condition, the sensory evidence must be stronger for the participant to report presence, and  
669 therefore it is also likely to trigger oculomotor freezing. In the liberal condition, some explicit  
670 reports of target presence are guesses with low sensory evidence, which will not exceed the  
671 criterion for oculomotor freezing, so microsaccade rates should be higher.

672 **Figure 3a** plots the mean microsaccade rates on target absent trials, separated by bias  
673 condition and the participant's explicit report of whether a target was present or not (correct  
674 reject trials in dark lines, false alarm trials in bright lines). In a prior study (White and Rolfs  
675 2016), we found that microsaccade rates were lower on false alarm than correct reject trials,

676 consistent with the notion that a spurious sensory signal triggered both an explicit false alarm  
677 and oculomotor freezing. The distinct-criteria hypothesis predicts that effect (the relative  
678 inhibition of microsaccades on false alarm trials) should be weakened in the liberal condition,  
679 when many false alarms are guesses without a sensory signal strong enough to inhibit  
680 microsaccades.

681 To test these predictions, we integrated microsaccade rates over the 0 to 500 ms time  
682 window (shaded region) and then computed the effect of explicit report as a modulation  
683 index:  $(CR - FR) / (CR + FR)$ , where CR is the microsaccade rate on correct reject trials and  
684 FR is the microsaccade rate on false alarm trials. The occurrence of oculomotor freezing on  
685 false alarm trials predicts a positive index. In addition, the distinct-criteria hypothesis predicts  
686 a larger index in the conservative compared to the liberal condition. The mean indices are  
687 plotted in **Figure 3b** and listed in Table 2 with 95% CIs and BFs. Only in the conservative  
688 condition of Experiment 2 was the effect of report significant. According to a linear mixed  
689 effects model that combined experiments, there was a small but significant difference  
690 between microsaccade rates on correct reject vs. false alarm trials (mean index = 0.11, CI =  
691 [0.004 0.209],  $p=0.04$ ,  $BF=1.4$ ), a marginal effect of bias condition (index 0.2 larger in the  
692 conservative condition, CI = [0.002 0.41],  $p=0.053$ ;  $BF=1.28$ ), and no effect of experiment nor  
693 interaction (both  $p>0.4$ ,  $BF<0.25$ ). All told, the data in **Figure 3b** support our previous finding  
694 that false alarms are associated with inhibition of microsaccades, and are consistent with the  
695 distinct-criteria hypothesis. However, this analysis is limited due to the small number of false  
696 alarm trials in the conservative condition (on average across participants, only 20 trials in  
697 Experiment 1 and 70 in Experiment 2). The target-present trials provide supporting evidence.

698 **Figure 3c** plots microsaccade rates on target-present trials. These traces diverge around  
699 stimulus onset (i.e., 0 ms) due to the reductive effect of microsaccades on perceptual  
700 sensitivity (Rolfs 2009; Scholes et al. 2018; White and Rolfs 2016; Zuber et al. 1964): a  
701 microsaccade that occurs close in time to the stimulus onset can make the participant miss  
702 the stimulus, thus miss trials are associated with a peak in the microsaccade rate near time  
703 0. That peak is especially large in the liberal condition, when misses are less frequent and  
704 require a definite lack of target evidence. Conversely, hits are associated with fewer  
705 microsaccades near the time of stimulus onset, and thus there is a dip in microsaccade rate  
706 on hit trials. That dip is larger in the conservative condition, when hits require high certainty  
707 and would otherwise be turned to misses by microsaccades. We previously confirmed that  
708 the drop in microsaccade rates on hit trials ~150-400 ms post-stimulus is not an artifact of the



709 divergent dips and peaks observed around 0 ms due to saccadic suppression of perception  
 710 (White and Rolfs 2016).

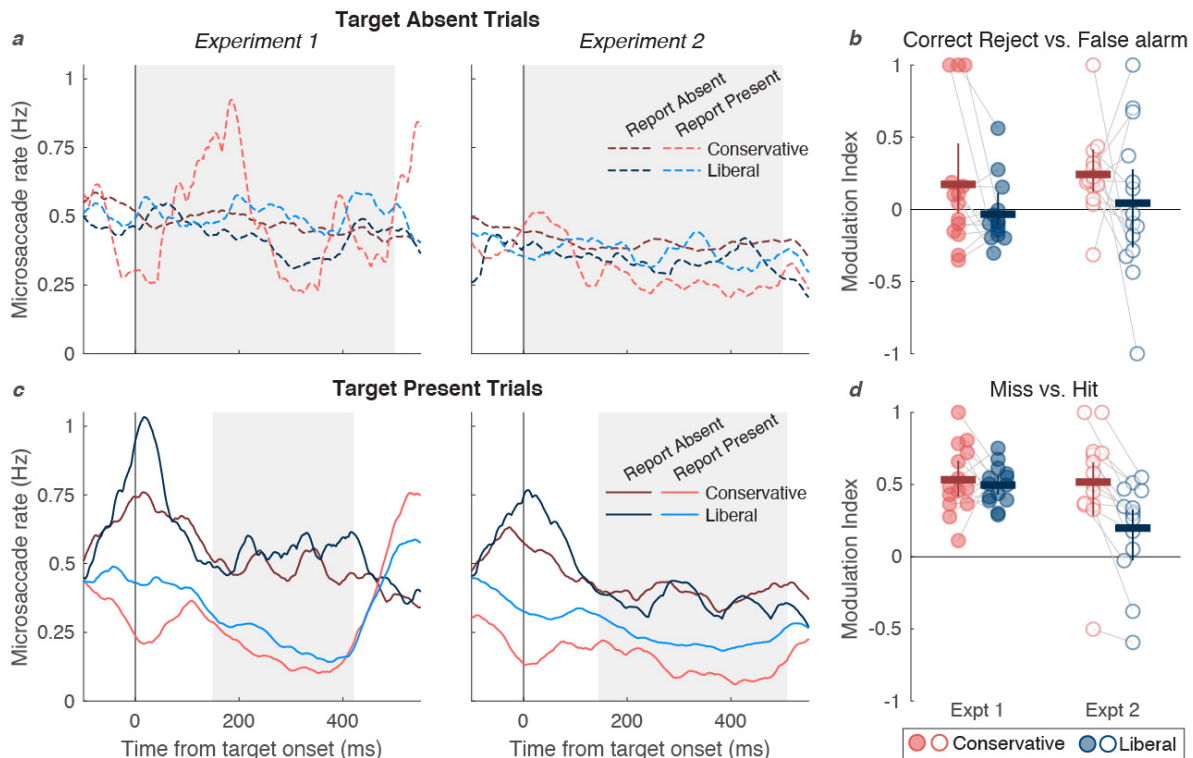

711 **Figure 3: Microsaccade rate signatures as a function of bias condition and explicit**  
 712 **report outcome. (a)** Mean rates as a function of time on target absent trials, separated by  
 713 bias condition and by whether the participant reported target absent (correct reject trials, dark  
 714 lines) or target present (false alarm trials, bright lines). Note there are very few false alarm  
 715 trials in the conservative condition (bright red lines) **(b)** The mean modulation indices  
 716 comparing microsaccade rates on correct reject trials and false alarm trials, integrated over 0  
 717 to 500 ms (shaded interval in panel a). Format as in Figure 1a, except the error bars are  
 718 bootstrapped 95% confidence intervals to highlight significant deviations from zero. The  
 719 overall effect of perceptual report is significant, and marginally higher on conservative than  
 720 liberal trials. **(c)** Mean microsaccade rates on target present trials, separated by bias  
 721 condition and by whether the participant reported target absent (miss trials, dark lines) or  
 722 reported target present (hit trials, bright lines). **(d)** The mean indices comparing  
 723 microsaccade rates on miss and hit trials, integrated over the intervals with significant  
 724 stimulus-induced inhibition (shaded in panel c). Microsaccade rates are significantly lower on  
 725 hit than miss trials, and that effect is significantly larger on conservative than liberal trials.  
 726  
 727

728 Our current research question focuses on the later time period, starting roughly 150 ms post-  
 729 stimulus, when stimulus detection is associated with inhibition of microsaccades. We tested  
 730 whether that effect of perceptual report (misses vs hits) is equal in the two bias conditions.  
 731 The distinct-criteria hypothesis predicts greater inhibition on hit trials of the conservative

732 condition, because conservative hits are “purer” (i.e., they contain fewer lucky guesses) and  
 733 require a strong sensory signal that is also likely to trigger oculomotor freezing.

734 Indeed, the microsaccade rate dips lower on hit trials of the conservative condition (**Figure**  
 735 **3c**, light red lines) than of the liberal condition (light blue lines). To summarize these effects,  
 736 we integrated microsaccade rates over the time window with significant inhibition (shaded  
 737 windows in **Figures 2a, 2b**, and **3b**). For each bias condition we then computed the effect of  
 738 explicit detection as a modulation index:  $(M-H)/(M+H)$ , where M is the microsaccade rate on  
 739 miss trials and H is the rate on hit trials. The effect of explicit detection was significant (95%  
 740 CI of the index excludes 0) in all conditions except the liberal condition of Experiment 2 (see  
 741 **Table 3**). According to a linear mixed effects model, that modulation index was significantly  
 742 larger in the conservative than liberal condition (by 0.18 on average, CI = [0.08 0.14],  
 743  $p=0.0004$ ; BF=34.0). This is strong evidence that correct reports of target presence in the  
 744 conservative condition are associated with stronger inhibition of microsaccades than in the  
 745 liberal condition. The effect of bias condition was also larger in Experiment 2 than  
 746 Experiment 1 (interaction between condition and experiment,  $p=0.004$ ; BF=6.32).

|                |              | Correct reject - False alarm |                |      | Miss - Hit       |                |                   |
|----------------|--------------|------------------------------|----------------|------|------------------|----------------|-------------------|
|                | Condition    | Modulation index             | Index 95% CI   | BF   | Modulation index | Index 95% CI   | BF                |
| <b>Expt. 1</b> | Conservative | 0.17 (0.13)                  | [-0.039 0.437] | 0.58 | 0.53 (0.06)      | [0.429 0.657]  | $1.4 \times 10^4$ |
|                | Liberal      | -0.03 (0.06)                 | [-0.121 0.116] | 0.41 | 0.50 (0.04)      | [0.433 0.566]  | $2.6 \times 10^6$ |
| <b>Expt. 2</b> | Conservative | 0.24 (0.08)                  | [0.128 0.403]  | 7.47 | 0.52 (0.10)      | [0.248 0.671]  | 197.6             |
|                | Liberal      | 0.04 (0.14)                  | [-0.226 0.319] | 0.27 | 0.20 (0.09)      | [-0.008 0.333] | 1.68              |

747 **Table 3: Effects of perceptual report on microsaccade rates, expressed as modulation**  
 748 **indices.** The columns labeled “Modulation index” contain the mean, with standard error  
 749 across participants in parentheses. The 95% CIs are derived from bootstrapping.

750 These data consistently support the distinct-criteria hypothesis: oculomotor freezing is  
 751 triggered when a sensory signal crosses a threshold that is independent of the participant’s  
 752 decision bias. The sensory signal is more likely to have crossed that oculomotor threshold on  
 753 hit trials of the conservative condition, when the criterion for explicit report is higher, than on  
 754 hit trials of the liberal condition. Thus, when the participant was induced to adopt a more

755 conservative decision bias, explicit detection of the stimulus was associated with more  
756 pronounced oculomotor freezing.

## 757 **DISCUSSION**

758 Detecting potentially relevant stimuli in the environment is a fundamental task of perceptual  
759 systems. Our data suggest that although sensory input is continuous and noisy, the brain  
760 switches into a qualitatively different state when there is sufficient evidence that a target is  
761 present. Passing this threshold gives rise to a conscious percept *and* an involuntary pause of  
762 saccadic eye movements (that is, oculomotor freezing). A pause in microsaccades can be  
763 considered the oculomotor system's "report" that it detected a stimulus. The participant's  
764 decision to respond voluntarily to the stimulus — for instance, by pressing a button —  
765 depends on the conscious percept as well as potential rewards and expectations.

766 Visual stimulus detection therefore has three consequences that are of interest to the present  
767 investigation: a conscious percept, a decision to report stimulus presence, and oculomotor  
768 freezing. It is crucial that we understand how those three consequences relate in terms of  
769 neural and cognitive mechanisms. Provided oculomotor freezing is indeed a proxy for  
770 conscious perception (as we argue below), researchers would be equipped with a "no-report"  
771 paradigm to investigate the neural correlates of consciousness (Tsuchiya et al. 2015) without  
772 interference from explicit cognitive tasks.

773 In five independent experiments across this study and a previous one (White and Rolfs  
774 2016), we consistently found that explicit reports and oculomotor freezing covary: the eyes  
775 only freeze in response to stimuli that the person reports seeing. To explain that covariation,  
776 here we manipulated the likelihood of explicit reports of stimulus presence. When rewards  
777 and penalties were greater on target-present than target-absent trials (Experiment 1), or  
778 when the target probability was known to be high (Experiment 2), participants adopted a  
779 liberal decision criterion, reporting target presence much more often than in the opposite  
780 (conservative) conditions (**Figure 1**).

781 In contrast, the magnitude of the drop in microsaccade rates just after stimulus onset showed  
782 little to no effect of our bias manipulations (**Figure 2**). We need not rely only on that null  
783 result, however, because we also found effects of the bias condition when splitting the trials  
784 according to the explicit report (**Figure 3**). The difference in microsaccade rates between hit  
785 and miss trials, which indexes the link between explicit reports and oculomotor freezing, was

786 larger in the conservative than the liberal condition. Our interpretation is that when  
787 participants make conservative decisions, they only report sensations that are strong enough  
788 to also trigger oculomotor freezing. In contrast, when participants make liberal decisions,  
789 they often make strategic guesses that a stimulus was present, even when the sensory  
790 signal was weak and oculomotor freezing was not triggered.

791 We therefore reject the shared-criterion hypothesis and support the distinct-criteria  
792 hypothesis (described in the Introduction). The criteria in question specify the magnitude of  
793 sensory evidence required to trigger a response. There is one criterion for explicitly reporting  
794 stimulus presence, and it can be shifted to maximize rewards. There is also a distinct  
795 criterion for inhibiting eye movements, which is relatively stable and not affected by shifts of  
796 decision criterion.

797 This conclusion is consistent with studies that predicted individual perceptual contrast  
798 thresholds based on microsaccade patterns that were measured while the participant did not  
799 explicitly respond to the stimuli (Bonneh et al. 2015; Denniss et al. 2018; Scholes et al.  
800 2015). These studies show that oculomotor freezing is not related to response preparation.  
801 However, participants in those studies either had to silently count the stimuli (Bonneh et al.  
802 2015), or prepare to respond on a random subset of trials (Denniss et al. 2018; Scholes et al.  
803 2015), so they were likely making covert decisions about each stimulus. Therefore, decision-  
804 making processes could have contributed to oculomotor freezing in those data. Our data help  
805 isolate the link between perception and oculomotor freezing.

806 A key feature of our theory is that oculomotor freezing is all-or-none, not graded. In a prior  
807 study (White and Rolfs 2016), we varied the visibility of a target grating by varying its  
808 luminance contrast, or by adapting the observer to the same or different orientation.  
809 Considering all target-present trials, the degree of oculomotor freezing scaled with explicit  $d'$ .  
810 However, when considering only hit trials, oculomotor freezing was equivalently across all  
811 contrast levels and adaptation states. Intense stimuli had no effect on eye movements if the  
812 observer missed them, and faint stimuli were accompanied by full-fledged inhibition provided  
813 they were detected. We found similar patterns in the new data reported above, providing  
814 consistent support that oculomotor freezing is a discrete all-or-none reflex that occurs if and  
815 only if a stimulus is consciously detected. Such a model is reminiscent of “high threshold  
816 theory,” which has been largely discredited (Swets 1961). Standard signal detection theory,  
817 which has been more successful, assumes no threshold for detection other than the

818 observer's flexible decision criterion. In that regard, the data presented here are not fully  
819 consistent with standard signal detection theory.

820 Our data are, at least in part, consistent with the "global neuronal workspace theory" of  
821 consciousness. It proposes that a stimulus becomes reportable when "ignites" sustained  
822 neural communication across the brain (Mashour et al. 2020). Recent electrophysiological  
823 data suggest that ignition occurs when activity in frontal cortex, not sensory cortex, reaches a  
824 threshold, roughly 200 ms after stimulus onset (Van Vugt et al. 2018). We might speculate  
825 that such an 'ignition' is related to oculomotor freezing, but it occurs later than the initial drop  
826 in microsaccade rates.

827 For now, we consider two possibilities for how oculomotor freezing relates to the conscious  
828 experience of the stimulus that triggers it. Both are compatible with the distinct-criteria  
829 hypothesis described in the Introduction. (1) Oculomotor freezing and conscious perception  
830 are tightly coupled, because they are both triggered when the same sensory signal crosses  
831 the same threshold. That threshold is not affected by bias manipulations, unlike the criterion  
832 for explicit reports. (2) Oculomotor freezing and conscious perception can be dissociated,  
833 because the threshold for oculomotor freezing is stable but the threshold for conscious  
834 perception is affected by bias manipulations, along with the decision criterion. While our data  
835 reveal that explicit reports and oculomotor freezing have distinct criteria, they are consistent  
836 with both possibilities regarding conscious perception.

837 We nonetheless favor the first possibility: oculomotor freezing and conscious perception are  
838 coupled. This hypothesis must also assume that the bias manipulations (payoffs and  
839 probability cues) affect decisions at a post-perceptual stage. Specifically, in the liberal  
840 conditions, observers reported "yes" more often because doing so maximized rewards, not  
841 because they actually saw the target more often. That is why the difference in microsaccade  
842 rates between hit and correct reject trials is weaker in the liberal than conservative condition.  
843 The implication is that oculomotor freezing provides an implicit index of conscious perception  
844 that is free of bias.

845 However, this conclusion fails if the bias manipulations do affect conscious perception (i.e.,  
846 the second possibility). There is some neurophysiological evidence that expectations, as  
847 manipulated by the probability cues in Experiment 2, can affect sensory processing (De  
848 Lange et al. 2018; Pajani et al. 2015). One theory is that expecting a stimulus evokes a

849 “template” in neural populations that prefer the expected features (Kok et al. 2014, 2017). In  
850 contrast, one fMRI study concluded that payoff and probability manipulations recruit frontal  
851 and parietal brain regions involved in decision-making to shift the starting point of evidence  
852 accumulation, similar to a criterion shift (Mulder et al. 2012). The existing behavioral  
853 evidence is also ambiguous. One study argued that expectation improves detection by  
854 elevating the baseline of “signal-selective units” (Wyart et al. 2012). Another found that  
855 probability cues presented *after* the stimulus had similar effects as cues presented *before* the  
856 stimulus, in favor of a post-perceptual criterion shift (Bang and Rahnev 2017). It remains a  
857 matter of discussion, therefore, whether expectations affect conscious perception or decision  
858 processes (Press et al. 2020; Rungratsameetaweemana et al. 2018;  
859 Rungratsameetaweemana and Serences 2019; Summerfield and Egnér 2016). The simplest  
860 model that explains our data assume that they affect decision processes only.

861 We must also note that the results favoring the distinct-criteria hypothesis are clearer in  
862 Experiment 2 (which manipulated expectations) than Experiment 1 (which manipulated  
863 rewards). Indeed, other researchers have found that probability manipulations have stronger  
864 effects on perceptual decisions than reward manipulations do (Leite and Ratcliff 2011;  
865 Mulder et al. 2012; Simen et al. 2009). In our case there are several possible explanations:  
866 first, there were greater individual differences in explicit report criteria in Experiment 1  
867 (**Figure 1d**), perhaps due to variable interpretations of, or value placed in, the rewards. Such  
868 individual differences may have added noise to the microsaccade data as well. Second,  
869 overall  $d'$  levels were higher in Experiment 1 than 2 (**Figure 1c**). The bias manipulations are  
870 likely to have greater effects when the target is difficult to detect. Third, it may be that  
871 expected rewards affect decisions at a post-perceptual stage, whereas expectations affect  
872 perception, as discussed above. In that case, the explicit reports in Experiment 1 were less  
873 driven by the sensory signal, thus showing a less clear relationship with oculomotor freezing.  
874 In contrast, Experiment 2 could be explained by a model in which expecting a stimulus  
875 lowers the sensory threshold for conscious perception, but does not affect the threshold for  
876 oculomotor freezing. While this model would explain the smaller difference in microsaccade  
877 rates between hit and miss trials in the liberal condition (**Figure 3d**), it is comparably  
878 complicated.

879 We may also consider the probability cues of Experiment 2 in light of the “predictive coding”  
880 framework (De Lange et al. 2018). A target in the “conservative” condition is unexpected, and

881 thus should produce a larger prediction error. If oculomotor freezing is a “surprise” response,  
882 then we would have predicted a larger drop in microsaccades in target-present trials of the  
883 conservative condition than the liberal condition. We did observe that, but only on hit trials  
884 (**Figure 3c**). The predictive coding framework may therefore help explain oculomotor  
885 freezing.

886 Altogether, the most parsimonious explanation for our results is that oculomotor freezing and  
887 conscious detection share a common sensory threshold. This threshold is distinct from the  
888 decision criterion to report a stimulus, which is shifted by weighted payoffs and expectations.  
889 The alternate explanation, that the threshold for conscious detection can diverge from the  
890 threshold for oculomotor freezing, is more complicated. It must either postulate an additional  
891 free parameter, for a total of three sensory thresholds/criteria, or it must assume that the  
892 decision criterion is also the threshold for perception and thus bias manipulations truly affect  
893 perception. To the extent that the more parsimonious explanation stands, oculomotor  
894 freezing provides a valuable tool to measure conscious perception free of the influence of  
895 decision bias, and without requiring explicit reports.

896

897

898 **References**

899 **Abeles D, Amit R, Tal-Perry N, Carrasco M, Yuval-Greenberg S.** Oculomotor inhibition  
900 precedes temporally expected auditory targets. *Nat Commun* 11: 1–12, 2020.

901 **Amit R, Abeles D, Carrasco M, Yuval-Greenberg S.** Oculomotor inhibition reflects  
902 temporal expectations. *Neuroimage* 184: 279–292, 2019.

903 **Badde S, Myers CF, Yuval-Greenberg S, Carrasco M.** Oculomotor freezing reflects tactile  
904 temporal expectation and aids tactile perception. *Nat Commun* 11: 1–9, 2020.

905 **Bang JW, Rahnev D.** Stimulus expectation alters decision criterion but not sensory signal in  
906 perceptual decision making. *Sci Rep* 7: 1–12, 2017.

907 **Benjamini Y, Hochberg Y.** Controlling the False Discovery Rate: A Practical and Powerful  
908 Approach to Multiple Testing [Online]. *J R Stat Soc Ser B* 90: 289–300,  
909 1995<http://www.pnas.org/content/90/12/5718.short> [17 Feb. 2012].

910 **Betta E, Turatto M.** Are you ready? I can tell by looking at your microsaccades. *Neuroreport*  
911 17: 1001–1004, 2006.

912 **Bonneh YS, Adini Y, Polat U.** Contrast sensitivity revealed by microsaccades. *J Vis* 15: 1–  
913 12, 2015.

914 **Brainard DH.** The psychophysics toolbox. *Spat Vis* 10: 443–446, 1997.

915 **Cornelissen FW, Peters EM, Palmer J.** The eyelink toolbox: Eye tracking with MATLAB and  
916 the psychophysics toolbox. *Behav Res Methods, Instruments, Comput* 34: 614–617, 2002.

917 **Crapse TB, Lau H, Basso MA.** A Role for the Superior Colliculus in Decision Criteria.  
918 *Neuron* 97: 181-194.e6, 2018.

919 **Denison RN, Yuval-Greenberg S, Carrasco M.** Directing voluntary temporal attention  
920 increases fixational stability. *J Neurosci* 39: 353–363, 2019.

921 **Denniss J, Scholes C, McGraw P V., Nam SH, Roach NW.** Estimation of contrast  
922 sensitivity from fixational eye movements. *Investig Ophthalmol Vis Sci* 59: 5408–5416, 2018.

923 **Efron B, Tibshirani R.** *An Introduction to the Bootstrap*. New York: Chapman and Hall,  
924 1993.



- 925 **Engbert R, Kliegl R.** Microsaccades uncover the orientation of covert attention. *Vision Res*  
926 43: 1035–1045, 2003.
- 927 **Engbert R, Mergenthaler K.** Microsaccades are triggered by low retinal image slip. *Proc*  
928 *Natl Acad Sci* 103: 7192–7197, 2006.
- 929 **Hafed ZM.** Mechanisms for generating and compensating for the smallest possible  
930 saccades. *Eur J Neurosci* 33: 2101–2113, 2011.
- 931 **Hafed ZM, Goffart L, Krauzlis RJ.** A neural mechanism for microsaccade generation in the  
932 primate superior colliculus. *Science (80- )* 323: 940–943, 2009.
- 933 **Hafed ZM, Ignashchenkova A.** On the dissociation between microsaccade rate and  
934 direction after peripheral cues: microsaccadic inhibition revisited. *J Neurosci* 33: 16220–  
935 16235, 2013.
- 936 **Kaernbach C.** A single-interval adjustment-matrix (SIAM) procedure for unbiased adaptive  
937 testing [Online]. *J Acoust Soc Am* 88: 2645–2655,  
938 1990<http://link.aip.org/link/jasman/v88/i6/p2645/s1> [4 Oct. 2012].
- 939 **Kass RE, Raftery AE.** Bayes Factors. *J Am Stat Assoc* 90: 773–795, 1995.
- 940 **Kok P, Failing MF, de Lange FP.** Prior expectations evoke stimulus templates in the primary  
941 visual cortex. *J Cogn Neurosci* 26: 1546–1554, 2014.
- 942 **Kok P, Mostert P, De Lange FP.** Supporting Information for: Prior expectations induce  
943 prestimulus sensory templates. *Proc Natl Acad Sci* , 2017.
- 944 **Kubovy M.** A possible basis for conservatism in signal detection and probabilistic  
945 categorization tasks. *Percept Psychophys* 22: 277–281, 1977.
- 946 **De Lange FP, Heilbron M, Kok P.** How Do Expectations Shape Perception? Perceptual  
947 Consequences of Expectation. *Trends Cogn Sci* 22: 764–779, 2018.
- 948 **Leite FP, Ratcliff R.** What cognitive processes drive response biases? A diffusion model  
949 analysis. *Judgm Decis Mak* 6: 651–687, 2011.
- 950 **Macmillan NA, Creelman CD.** *Detection Theory: A User's Guide*. Mahway, New Jersey:  
951 Lawrence Erlbaum Associates, 2005.
- 952 **Mashour GA, Roelfsema P, Changeux JP, Dehaene S.** Conscious Processing and the  
953 Global Neuronal Workspace Hypothesis. *Neuron* 105: 776–798, 2020.

- 954 **Mulder MJ, Wagenmakers EJ, Ratcliff R, Boekel W, Forstmann BU.** Bias in the brain: A  
955 diffusion model analysis of prior probability and potential payoff. *J Neurosci* 32: 2335–2343,  
956 2012.
- 957 **Otero-Millan J, Macknik SL, Langston RE, Martinez-Conde S.** An oculomotor continuum  
958 from exploration to fixation. *Proc Natl Acad Sci U S A* 110: 6175–6180, 2013.
- 959 **Pajani A, Kok P, Kouider S, de Lange FP.** Spontaneous activity patterns in primary visual  
960 cortex predispose to visual hallucinations. *J Neurosci* 35: 12947–12953, 2015.
- 961 **Pelli DG.** The VideoToolbox software for visual psychophysics: Transforming numbers into  
962 movies. *Spat Vis* 10: 437–442, 1997.
- 963 **Press C, Kok P, Yon D.** The Perceptual Prediction Paradox. *Trends Cogn Sci* 24: 13–24,  
964 2020.
- 965 **Reingold EM, Stampe DM.** Saccadic inhibition in voluntary and reflexive saccades. *J Cogn*  
966 *Neurosci* 14: 371–88, 2002.
- 967 **Rolfs M.** Microsaccades: small steps on a long way. *Vision Res* 49: 2415–2441, 2009.
- 968 **Rolfs M, Kliegl R, Engbert R.** Toward a model of microsaccade generation: The case of  
969 microsaccadic inhibition. *J Vis* 8(11):5: 1–23, 2008.
- 970 **Rolfs M, Laubrock J, Kliegl R.** Shortening and prolongation of saccade latencies following  
971 microsaccades. *Exp brain Res* 169: 369–76, 2006.
- 972 **Rouder JN, Morey RD, Speckman PL, Province JM.** Default Bayes factors for ANOVA  
973 designs. *J Math Psychol* 56: 356–374, 2012.
- 974 **Rouder JN, Speckman PL, Sun D, Morey RD, Iverson G.** Bayesian t tests for accepting  
975 and rejecting the null hypothesis. *Psychon Bull Rev* 16: 225–237, 2009.
- 976 **Rucci M, Poletti M.** Control and Functions of Fixational Eye Movements. *Annu Rev Vis Sci*  
977 1: 499–518, 2015.
- 978 **Rungratsameetaweemana N, Itthipuripat S, Salazar A, Serences JT.** Expectations do not  
979 alter early sensory processing during perceptual decision-making. *J Neurosci* 38: 5632–  
980 5648, 2018.
- 981 **Rungratsameetaweemana N, Serences JT.** Dissociating the impact of attention and  
982 expectation on early sensory processing. *Curr Opin Psychol* 29: 181–186, 2019.

- 983 **Scholes C, McGraw P V., Roach NW.** Selective modulation of visual sensitivity during  
984 fixation. *J Neurophysiol* 119: 2059–2067, 2018.
- 985 **Scholes C, McGraw P V, Nystrom M, Roach NW.** Fixational eye movements predict visual  
986 sensitivity. *Proc R Soc B* 282: 20151568, 2015.
- 987 **Simen P, Contreras D, Buck C, Hu P, Holmes P, Cohen JD.** Reward Rate Optimization in  
988 Two-Alternative Decision Making: Empirical Tests of Theoretical Predictions. *J Exp Psychol*  
989 *Hum Percept Perform* 35: 1865–1897, 2009.
- 990 **Summerfield C, Egnér T.** Feature-Based Attention and Feature-Based Expectation. *Trends*  
991 *Cogn Sci* 20: 401–404, 2016.
- 992 **Swets JA.** Is there a sensory threshold? *Science (80- )* 134: 168–177, 1961.
- 993 **Swets JA, Tanner WP, Birdsall TG.** Decision Processes In Perception. *Psychol Rev* 68:  
994 301–340, 1961.
- 995 **Tsuchiya N, Wilke M, Frässle S, Lamme VAF.** No-Report Paradigms: Extracting the True  
996 Neural Correlates of Consciousness. *Trends Cogn Sci* xx: 1–14, 2015.
- 997 **Van Vugt B, Dagnino B, Vartak D, Safaai H, Panzeri S, Dehaene S, Roelfsema PR.** The  
998 threshold for conscious report: Signal loss and response bias in visual and frontal cortex.  
999 *Science (80- )* 360: 537–542, 2018.
- 1000 **White AL, Rolfs M.** Oculomotor inhibition covaries with conscious detection. *J Neurophysiol*  
1001 116: 1507–1521, 2016.
- 1002 **Widmann A, Engbert R, Schröger E.** Microsaccadic Responses Indicate Fast  
1003 Categorization of Sounds: A Novel Approach to Study Auditory Cognition. *J Neurosci* 34:  
1004 11152–11158, 2014.
- 1005 **Wyart V, Nobre AC, Summerfield C.** Dissociable prior influences of signal probability and  
1006 relevance on visual contrast sensitivity. *Proc Natl Acad Sci U S A* 109: 3593–3598, 2012.
- 1007 **Zuber BL, Crider A, Stark L.** Saccadic suppression associated with microsaccades. *Q Prog*  
1008 *Rep* 74: 1964, 1964.
- 1009
- 1010
- 1011

1012 **Supplementary Data:** Two supplementary data figures can be viewed here:  
1013 <https://osf.io/t9by7/> .

#### 1014 **Acknowledgments**

1015 We are grateful to Michael Grubb, Jan-Nikolas Klanke and Dobromir Rahnev for comments  
1016 on this manuscript, to Jan-Nikolas Klanke for data collection, and to Richard Schweitzer for  
1017 technical assistance.

#### 1018 **Funding:**

1019 The Humboldt University Talent Travel Award (AW, JM)  
1020 Deutsche Forschungsgemeinschaft (DFG) grants RO3579/8-1 and RO3579/12-1 (MR).  
1021 National Institutes of Health grant K99 EY029366 (AW).

1022

#### 1023 **Author contributions:**

1024 Conceptualization: AW, JM, MR  
1025 Methodology: AW, JM, MR  
1026 Investigation: AW, MR  
1027 Software: AW, MR  
1028 Resources: MR  
1029 Formal analysis: AW  
1030 Visualization: AW  
1031 Supervision: MR  
1032 Writing—original draft: AW  
1033 Writing—review & editing: AW, MR

1034

1035 **Competing interests:** The authors have no financial for non-financial competing interests.

1036

1037

1038

1039

1040

1041

1042

1043

1044
